# Supplementary material for: Boosting the Peroxidase-Like Activity of Nanostructured Nickel by Inducing Its 3+ Oxidation State in LaNiO3 Perovskite and Its Application for Biomedical Assays
Source: PubMed Central journal article supplement — Theranostics. 2017 Jun 1;7(8):2277–86. doi: 10.7150/thno.19257 (PMC5505059; doi:10.7150/thno.19257), 2017-06-01
Supplement: thnov07p2277s1.pdf [file thnov07p2277s1.pdf]

# **Boosting the Peroxidase-Like Activity of Nanostructured Nickel by Inducing Its 3+ Oxidation State in LaNiO<sub>3</sub> Perovskite and Its Application for Biomedical Assays**

Xiaoyu Wang,<sup>1</sup> Wen Cao,<sup>1</sup> Li Qin,<sup>1</sup> Tingsheng Lin,<sup>2</sup> Wei Chen,<sup>2</sup> Shichao Lin,<sup>1</sup> Jia Yao,<sup>1</sup> Xiaozhi Zhao,<sup>2</sup>

Min Zhou,<sup>1</sup> Cheng Hang,<sup>3</sup> and Hui Wei<sup>1,4,\*</sup>

<sup>1</sup>Department of Biomedical Engineering, College of Engineering and Applied Sciences, Collaborative Innovation Center of Chemistry for Life Sciences, Nanjing National Laboratory of Microstructures, Nanjing University, Nanjing, Jiangsu, 210093, China;

<sup>2</sup>Department of Urology, Nanjing Drum Tower Hospital, the Affiliated Hospital of Nanjing University Medical School, Nanjing, Jiangsu, 210008, China.

<sup>3</sup>State Key Laboratory of Coordination Chemistry, School of Chemistry and Chemical Engineering, Nanjing University, Nanjing 210093, China.

<sup>4</sup>State Key Laboratory of Analytical Chemistry for Life Science, School of Chemistry and Chemical Engineering, Nanjing University, Nanjing 210093, China.

Email: weihui@nju.edu.cn; Fax: +86-25-83594648; Tel: +86-25-83593272; Web:  
<http://weilab.nju.edu.cn>.

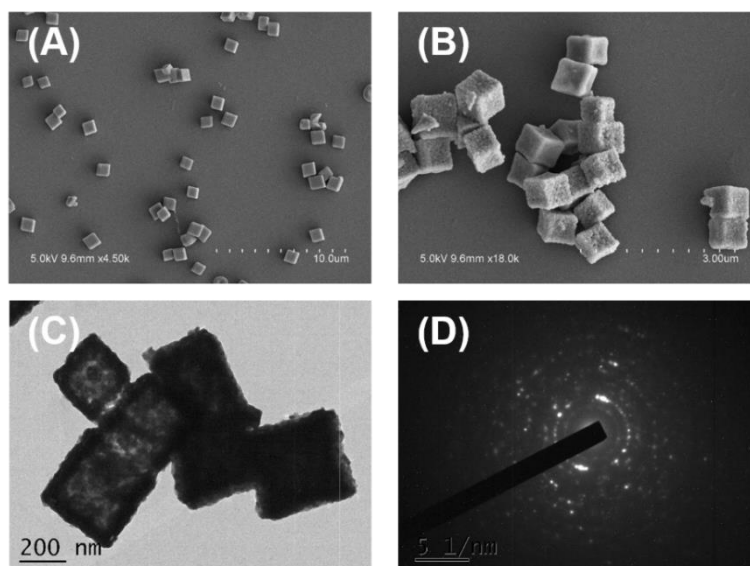

**Figure S1.** Representative SEM images of (A) the obtained nanocube-like precursors, and (B) the porous  $\text{LaNiO}_3$  nanocubes after annealing the precursors. (C) Representative TEM image of the porous  $\text{LaNiO}_3$  nanocubes. (D) Diffraction pattern of the porous  $\text{LaNiO}_3$  nanocubes.

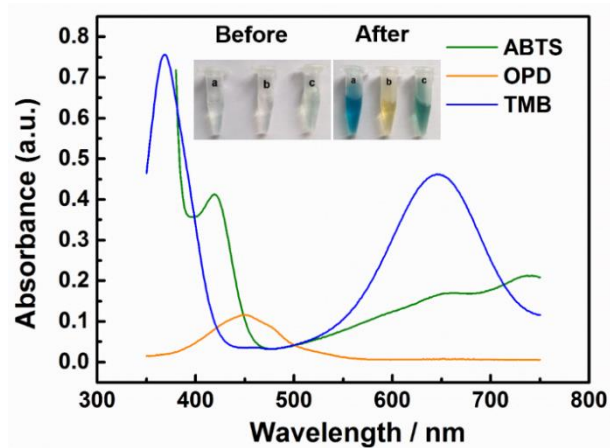

**Figure S2.** The absorption spectra of various peroxidase substrates catalytically oxidized by the porous LaNiO<sub>3</sub> nanocubes. Inset: corresponding images showing the visual color changes of (a) TMB, (b) OPD, and (c) ABTS before and after the porous LaNiO<sub>3</sub> nanocubes catalyzed oxidation.

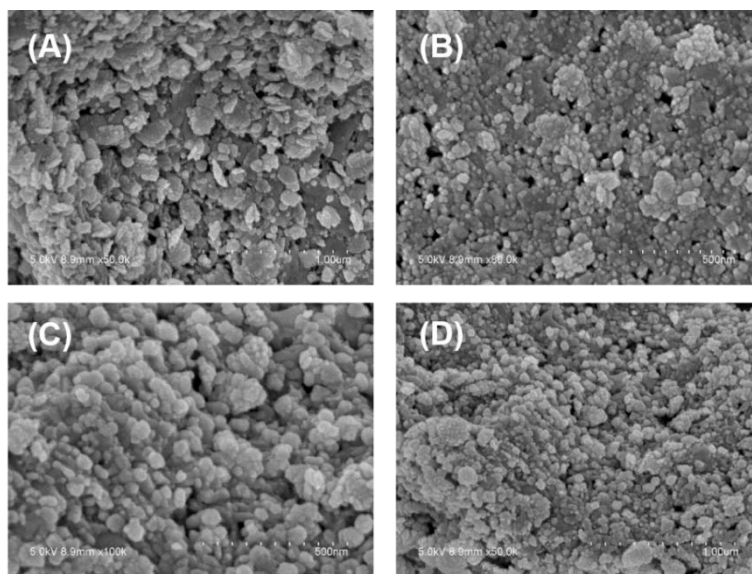

**Figure S3.** Representative SEM images of LaNiO<sub>3</sub>-SG.

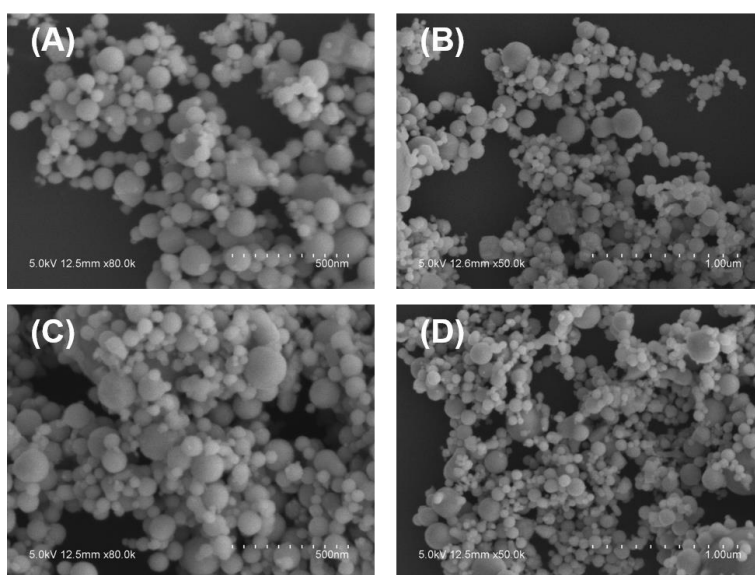

**Figure S4.** Representative SEM images of Ni nanoparticles.

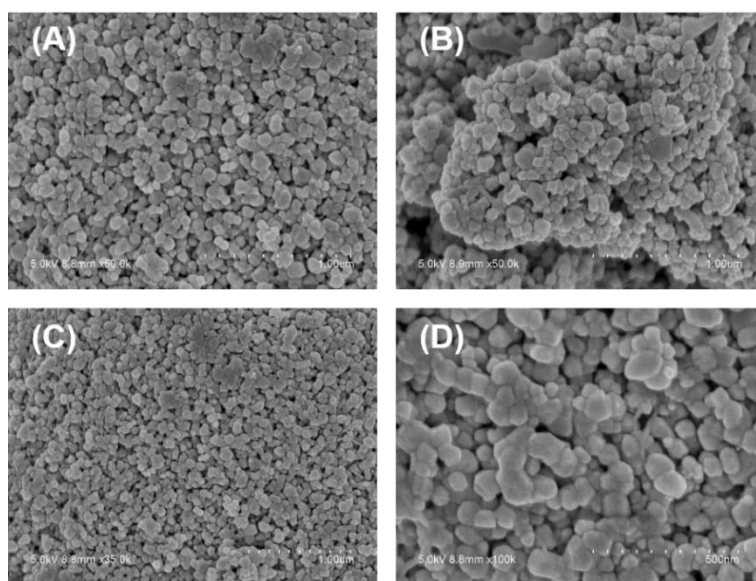

**Figure S5.** Representative SEM images of NiO.

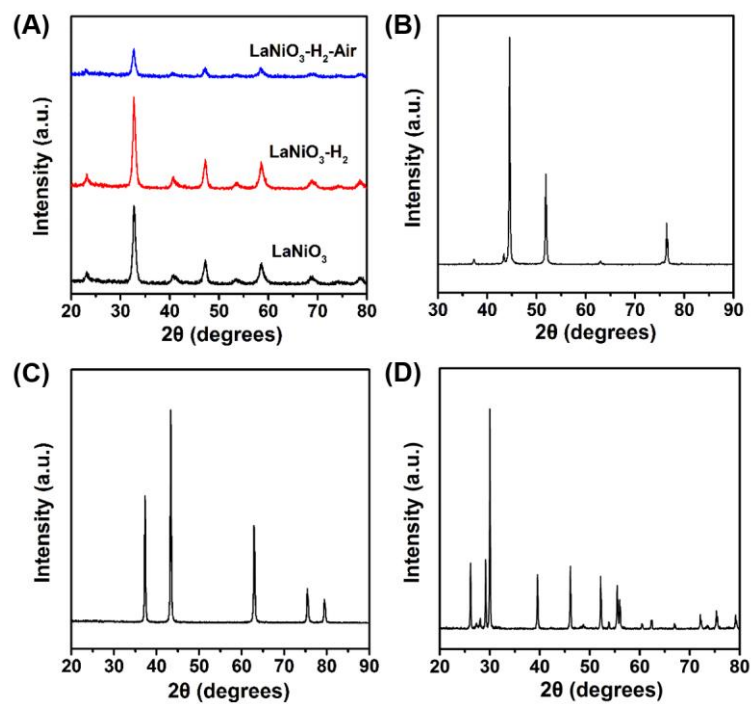

**Figure S6.** Powder X-ray diffraction patterns of (A)  $\text{LaNiO}_3$ ,  $\text{LaNiO}_3\text{-H}_2$ , and  $\text{LaNiO}_3\text{-H}_2\text{-Air}$ ; (B) Ni nanoparticles; (C) NiO; (D)  $\text{La}_2\text{O}_3$ .

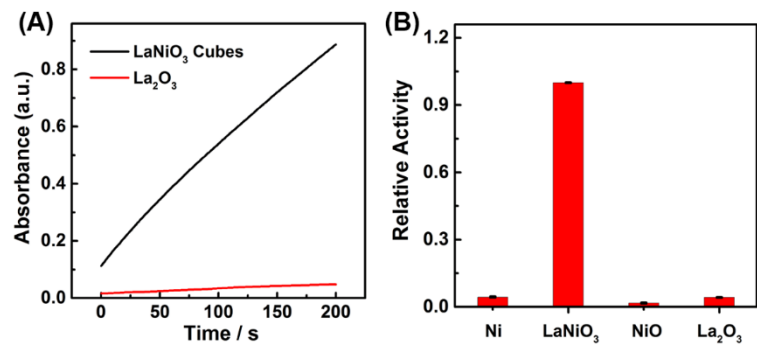

**Figure S7.** (A) Kinetic curves of A<sub>652</sub> for monitoring the catalytic oxidation of 1 mM TMB with 40 mM H<sub>2</sub>O<sub>2</sub> in the presence of 10 µg/mL of LaNiO<sub>3</sub> and La<sub>2</sub>O<sub>3</sub>. (B) Comparison of the peroxidase mimicking activities of Ni, LaNiO<sub>3</sub>, NiO, and La<sub>2</sub>O<sub>3</sub>.



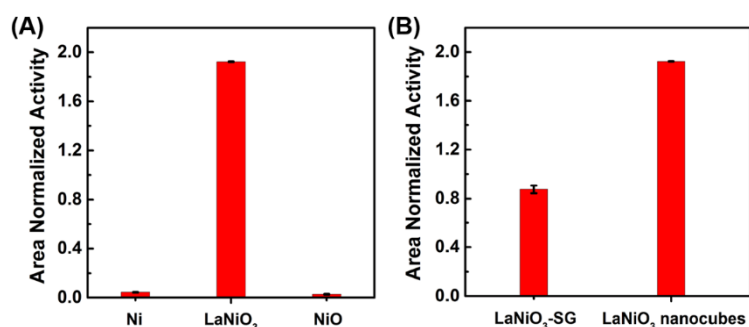

**Figure S8.** Comparison of the surface area normalized peroxidase mimicking activities of (A) Ni, LaNiO<sub>3</sub>, and NiO; (B) LaNiO<sub>3</sub>-SG and LaNiO<sub>3</sub> nanocubes.

As shown in [Figure S8](#), the surface area normalized peroxidase-like activities of Ni-based nanomaterials were investigated to exclude the effect of surface area on the catalytic activity. As shown in [Figure S8A](#), the surface area normalized results also showed that the oxidation state of nickel atom was very important for the peroxidase-like activity of Ni-based nanomaterials. The Ni<sup>3+</sup> was the optimal oxidation state for Ni-based nanomaterials with peroxidase-like activities. As shown in [Figure S8B](#), the LaNiO<sub>3</sub> nanocubes showed a higher surface area normalized activity than LaNiO<sub>3</sub>-SG, suggesting that the effect of morphology on the peroxidase-like activity of nanomaterials. In conclusion, the results obtained from the surface area normalized activity was well agreed with those obtained from mass normalized activity.

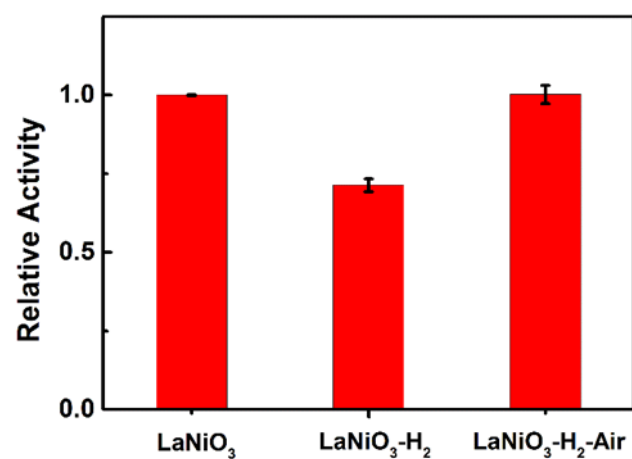

**Figure S9.** Comparison of the peroxidase mimicking activities of LaNiO<sub>3</sub>, LaNiO<sub>3</sub>-H<sub>2</sub>, and LaNiO<sub>3</sub>-H<sub>2</sub>-Air.

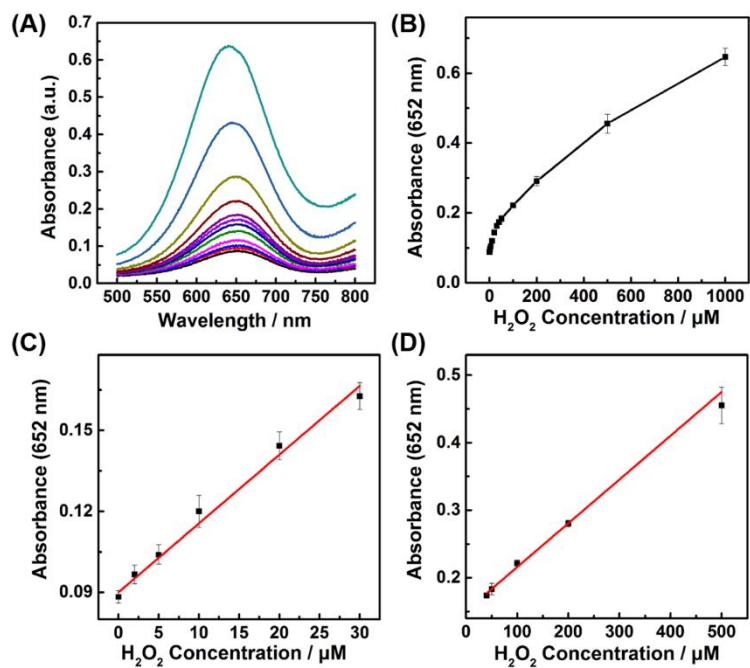

**Figure S10.** (A) Typical absorption spectra of TMB in the presence of different concentrations of H<sub>2</sub>O<sub>2</sub>. (B) Dependence of A<sub>652</sub> for monitoring the catalytic oxidation of TMB on the concentration of H<sub>2</sub>O<sub>2</sub> from 2 μM to 1 mM. (C, D) The linear calibration plots between the concentration of H<sub>2</sub>O<sub>2</sub> and the absorbance at 652 nm.

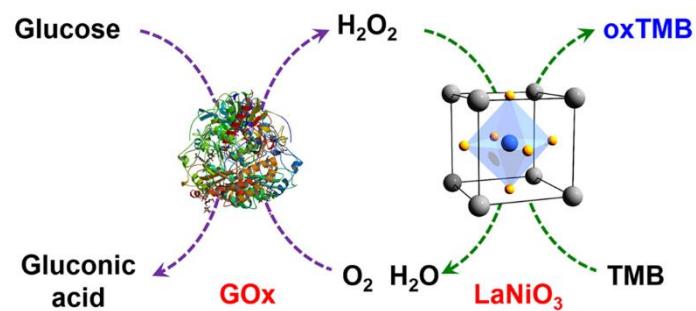

**Figure S11.** LaNiO<sub>3</sub> nanocubes as peroxidase mimic for colorimetric sensing of glucose by coupling with glucose oxidase (GOx).

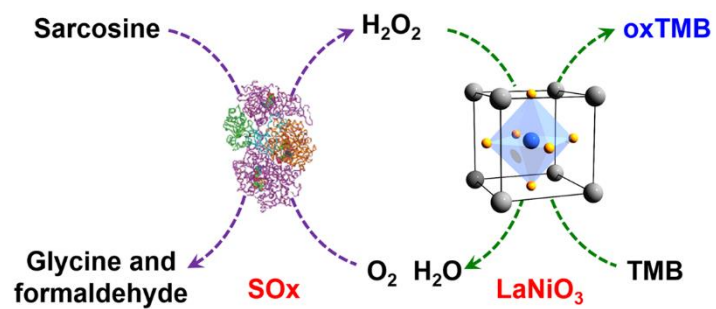

**Figure S12.** LaNiO<sub>3</sub> nanocubes as peroxidase mimic for colorimetric sensing of sarcosine by coupling with sarcosine oxidase (SOx).

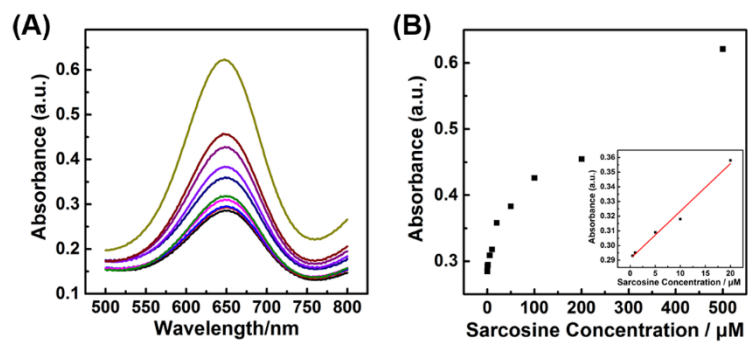

**Figure S13.** (A) Typical absorption spectra of TMB in the presence of different concentrations of sarcosine. (B) Dependence of  $A_{652}$  for monitoring the catalytic oxidation of TMB on the concentration of sarcosine from 0.5  $\mu\text{M}$  to 500  $\mu\text{M}$ . The inset shows the linear calibration plot between the concentration of sarcosine and the absorbance at 652 nm.

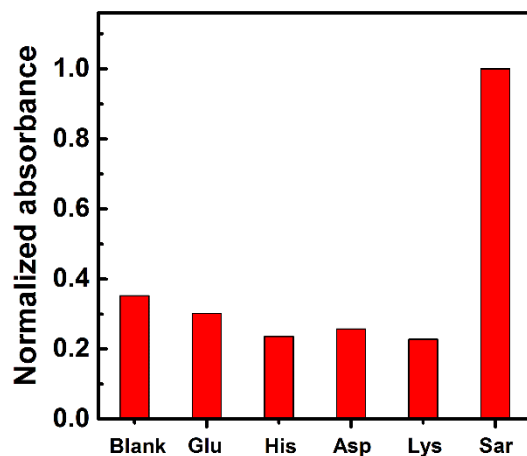

**Figure S14.** Selective detection of sarcosine with the porous  $\text{LaNiO}_3$  nanocubes. Absorbance of TMB at 652 nm in the absence and presence of 5 mM glutamic acid (Glu), 5mM histidine (His), 5 mM aspartic acid (Asp), 5 mM lysine (Lys) and 1 mM sarcosine (Sar).

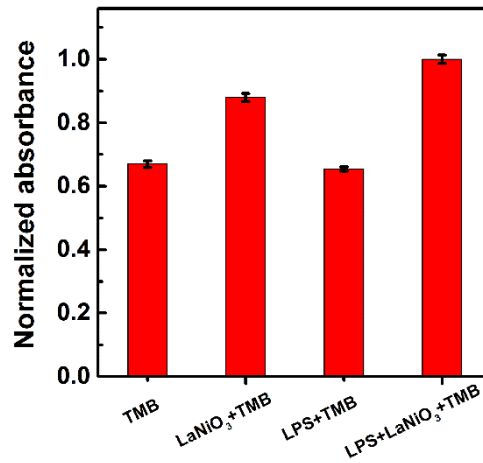

**Figure S15.** Colorimetric detection of *in-situ* generated H<sub>2</sub>O<sub>2</sub> in HeLa cells with LaNiO<sub>3</sub> nanocubes.

To detect H<sub>2</sub>O<sub>2</sub> in cells, lipopolysaccharides (LPS) were used to stimulate the cells to generate H<sub>2</sub>O<sub>2</sub>. As shown in [Figure S15](#), the cells with LaNiO<sub>3</sub> and TMB in the presence of LPS showed the highest colorimetric signals.



**Table S1.** Comparison of the kinetic parameters between porous LaNiO<sub>3</sub> nanocubes and HRP as well as other reported nanozymes

| Catalyst                       | Substrate                     | K <sub>m</sub> (mM) | V <sub>max</sub> (Ms <sup>-1</sup> ) | Ref.      |
|--------------------------------|-------------------------------|---------------------|--------------------------------------|-----------|
| LaNiO <sub>3</sub>             | TMB                           | 0.105               | 3.62×10 <sup>-7</sup>                | This work |
| LaNiO <sub>3</sub>             | H <sub>2</sub> O <sub>2</sub> | 90.05               | 2.6×10 <sup>-6</sup>                 | This work |
| Pd-Ir cubes                    | TMB                           | 0.13                | 6.5×10 <sup>-8</sup>                 | [1]       |
| Pd-Ir cubes                    | H <sub>2</sub> O <sub>2</sub> | 340                 | 5.1×10 <sup>-8</sup>                 | [1]       |
| GO-COOH                        | TMB                           | 0.0237              | 3.45×10 <sup>-8</sup>                | [2]       |
| GO-COOH                        | H <sub>2</sub> O <sub>2</sub> | 3.99                | 3.85×10 <sup>-8</sup>                | [2]       |
| Fe <sub>3</sub> O <sub>4</sub> | TMB                           | 0.098               | 3.44×10 <sup>-8</sup>                | [3]       |
| Fe <sub>3</sub> O <sub>4</sub> | H <sub>2</sub> O <sub>2</sub> | 154                 | 9.78×10 <sup>-8</sup>                | [3]       |
| HRP                            | TMB                           | 0.434               | 10×10 <sup>-8</sup>                  | [3]       |
| HRP                            | H <sub>2</sub> O <sub>2</sub> | 3.7                 | 8.71×10 <sup>-8</sup>                | [3]       |

K<sub>m</sub> is the Michaelis constant, V<sub>max</sub> is the maximal reaction velocity, Ref. is the abbreviation of References.

**Table S2.** BET surface area of the Ni-based nanomaterials studied in this work

| Ni-based nanomaterials       | BET surface area (m <sup>2</sup> /g) | Normalized BET surface area |
|------------------------------|--------------------------------------|-----------------------------|
| LaNiO <sub>3</sub> nanocubes | 3.11                                 | 0.52                        |
| LaNiO <sub>3</sub> -SG       | 3.79                                 | 0.63                        |
| NiO                          | 3.65                                 | 0.61                        |
| Ni                           | 5.93                                 | 1                           |

**Table S3.** Detection of glucose in human serum samples

| <b>Serum samples</b> | <b>Proposed method (mM, n=3)</b> | <b>Glucose meter (mM)</b> |
|----------------------|----------------------------------|---------------------------|
| <b>1</b>             | 10.08±1.35                       | 11.05                     |
| <b>2</b>             | 5.71±0.92                        | 6.00                      |
| <b>3</b>             | 10.78±1.51                       | 12.27                     |
| <b>4</b>             | 4.31±0.89                        | 5.05                      |

## References

1. Xia XH, Zhang JT, Lu N, Kim MJ, Ghale K, Xu Y, et al. Pd-Ir Core-Shell Nanocubes: A Type of Highly Efficient and Versatile Peroxidase Mimic. *ACS Nano*. 2015; 9: 9994-10004.
2. Song Y, Qu K, Zhao C, Ren J, Qu X. Graphene Oxide: Intrinsic Peroxidase Catalytic Activity and Its Application to Glucose Detection. *Adv Mater*. 2010; 22: 2206-2210.
3. Gao LZ, Zhuang J, Nie L, Zhang JB, Zhang Y, Gu N, et al. Intrinsic peroxidase-like activity of ferromagnetic nanoparticles. *Nat Nanotechnol*. 2007; 2: 577-583.
